# Supplementary material for: Benthic N2 fixation in coral reefs and the potential effects of human-induced environmental change
Source: PubMed Central journal article supplement (PMC4063469; doi:10.1002/ece3.1050), 2014-03-31
Supplement: ece30004-1706-SD1.pdf [file ece30004-1706-SD1.pdf]

# Benthic N<sub>2</sub> fixation in coral reefs and the potential effects of human-induced environmental change

Ulisse Cardini<sup>1\*</sup>, Vanessa Bednarz<sup>1</sup>, Rachel A. Foster<sup>2,4</sup> and Christian Wild<sup>1,3</sup>

<sup>1</sup>Coral Reef Ecology Group (CORE), Leibniz Center for Tropical Marine Ecology (ZMT), Fahrenheitstr. 6, 28359 Bremen, Germany

<sup>2</sup>Max Planck Institute for Marine Microbiology, Celsiusstr. 1, 28359 Bremen, Germany

<sup>3</sup>University of Bremen, Faculty of Biology and Chemistry (FB 2), Bremen, Germany

<sup>4</sup>current address: Department of Ecology, Environment, and Plant Sciences, Stockholm University, SE-10691 Stockholm, Sweden

\*corresponding author:

Ulisse Cardini

Tel: +49(0)421/238 00-138

Fax: +49(0)421/238 00-30

Email: [ulisse.cardini@zmt-bremen.de](mailto:ulisse.cardini@zmt-bremen.de)

## Supplementary Information

**Supplementary Table 1.** Values in this Table have been collected from the available literature and used to produce the graph in Fig. 3. Rates of N<sub>2</sub> fixation have been extrapolated from the text when possible, and the original conversion factor used by the authors has been reported. If no conversion was available, but only C<sub>2</sub>H<sub>2</sub> reduction rates were reported, the conservative 4:1 conversion ratio has been used. ARA = Acetylene Reduction Assay, <sup>15</sup>N<sub>2</sub> = labeling incubations with isotope <sup>15</sup>N<sub>2</sub>. Only studies with rates normalized to surface area are shown.

| Substrate            | Methods | Ratio<br>(mol C <sub>2</sub> H <sub>2</sub> :1 mol N <sub>2</sub> ) | N <sub>2</sub> fixation rates<br>(mg N m <sup>-2</sup> day <sup>-1</sup> ) | Location                      | References                    |
|----------------------|---------|---------------------------------------------------------------------|----------------------------------------------------------------------------|-------------------------------|-------------------------------|
| Scleractinian corals | ARA     | 4.00                                                                | 3.32 ± 3.70                                                                | Eilat, Israel                 | Shashar <i>et al.</i> (1994b) |
|                      | ARA     | 4.00                                                                | 0.29 - 1.13                                                                | Great Barrier Reef, Australia | Davey <i>et al.</i> (2008)    |
|                      | ARA     | 3.45                                                                | 9.75 ± 8.18                                                                | Eilat, Israel                 | Shashar <i>et al.</i> (1994a) |
|                      | ARA     | 4.00                                                                | 2.90 ± 2.19                                                                | Eilat, Israel                 | Shashar <i>et al.</i> (1994a) |
|                      | ARA     | 4.00                                                                | 3.69 ± 1.60                                                                | Eilat, Israel                 | Shashar <i>et al.</i> (1994a) |
|                      | ARA     | 4.00                                                                | 5.24 ± 0.25                                                                | Eilat, Israel                 | Shashar <i>et al.</i> (1994a) |
|                      | ARA     | 4.00                                                                | 3.69 ± 4.96                                                                | Eilat, Israel                 | Shashar <i>et al.</i> (1994a) |
|                      | ARA     | 3.45                                                                | 7.21 ± 2.69                                                                | Eilat, Israel                 | Shashar <i>et al.</i> (1994a) |
|                      | ARA     | 3.45                                                                | 0.68 ± 0.45                                                                | Eilat, Israel                 | Shashar <i>et al.</i> (1994a) |
|                      | ARA     | 3.00                                                                | 0.00 - 8.40                                                                | Akumal, Mexico                | Lesser <i>et al.</i> (2007)   |

|                       |                                    |             |               |                                 |                                     |
|-----------------------|------------------------------------|-------------|---------------|---------------------------------|-------------------------------------|
| Other cnidarians      | ARA                                | 4.00        | 30.0 ± 11.93  | Eilat, Israel                   | Shashar <i>et al.</i> (1994b)       |
|                       | ARA                                | 4.00        | 0.08 ± 0.25   | Eilat, Israel                   | Shashar <i>et al.</i> (1994b)       |
| Sponges               | ARA                                | 4.00        | 0.19 ± 0.34   | Eilat, Israel                   | Shashar <i>et al.</i> (1994b)       |
| Macro/Turf Algae      | ARA                                | 3.45        | 0.44 - 1.07   | Great Barrier Reef, Australia   | Larkum <i>et al.</i> (1988)         |
|                       | ARA                                | 3.45        | 8.18 ± 12.05  | St. Croix, US Virgin Island     | Williams and Carpenter (1997)       |
|                       | ARA                                | 4.00        | 22.69 ± 9.24  | Kaneohe Bay, Oahu, Hawaii       | Williams and Carpenter (1998)       |
|                       | ARA                                | 3.45        | 10.36 ± 0.56  | Eilat, Israel                   | Shashar <i>et al.</i> (1994b)       |
| Limestone/Dead corals | ARA                                | 4.00        | 0.00 - 42.16  | Great Barrier Reef, Australia   | Wilkinson <i>et al.</i> (1984)      |
|                       | ARA                                | 4.00        | 0.51 ± 0.78   | Eilat, Israel                   | Shashar <i>et al.</i> (1994b)       |
|                       | ARA                                | 3.45        | 10.72 ± 11.30 | Great Barrier Reef, Australia   | Larkum <i>et al.</i> (1988)         |
|                       | ARA + <sup>15</sup> N <sub>2</sub> | 3.30        | 2.12          | Tuamotu Atoll, French Polynesia | Charpy-Roubaud <i>et al.</i> (2001) |
|                       | ARA                                | 3.45        | 1.05 - 25.98  | Great Barrier Reef, Australia   | Davey <i>et al.</i> (2008)          |
|                       | ARA                                | 3.45        | 3.61 - 15.98  | Great Barrier Reef, Australia   | Larkum (1988)                       |
|                       | ARA                                | 3.45        | 62.23 ± 31.94 | Eilat, Israel                   | Shashar <i>et al.</i> (1994b)       |
|                       | ARA                                | 3.45        | 4.68 - 30.79  | Great Barrier Reef, Australia   | Larkum (1988)                       |
| Carbonate sands       | ARA                                | 3.00        | 0.06 - 0.26   | Great Barrier Reef, Australia   | Werner <i>et al.</i> (2008)         |
|                       | ARA + <sup>15</sup> N <sub>2</sub> | 3.00        | 1.80          | Barbados                        | Patriquin and Knowles (1975)        |
|                       | ARA                                | 4.00        | 1.10 - 8.50   | Great Barrier Reef, Australia   | Wilkinson <i>et al.</i> (1984)      |
|                       | ARA                                | 3.00        | 0.30 - 2.40   | Puerto Rico                     | Corredor and Capone (1985)          |
|                       | ARA                                | 4.00        | 0.13 - 4.08   | Bermuda                         | O'Neil and Capone (1989)            |
|                       | ARA                                | 4.00        | 0.71 - 5.17   | Puerto Rico                     | O'Neil and Capone (1989)            |
|                       | ARA                                | 4.00        | 0.07 - 0.69   | San Salvador, Bahamas           | O'Neil and Capone (1989)            |
|                       | ARA                                | 4.00        | 0.20 - 1.30   | Great Barrier Reef, Australia   | O'Neil and Capone (1989)            |
|                       | ARA + <sup>15</sup> N <sub>2</sub> | 3.16        | 2.00 - 10.00  | Moreton Bay, Australia          | O'Donohue <i>et al.</i> (1991)      |
|                       | ARA                                | 3.00        | 1.68 - 4.37   | Great Barrier Reef, Australia   | Capone <i>et al.</i> (1992)         |
|                       | ARA + <sup>15</sup> N <sub>2</sub> | 1.80 - 3.00 | 0.40 - 3.90   | Tuamotu Atoll, French Polynesia | Charpy-Roubaud <i>et al.</i> (2001) |
|                       | ARA                                | 3.45        | 21.87 ± 19.61 | Eilat, Israel                   | Shashar <i>et al.</i> (1994b)       |
|                       | ARA + <sup>15</sup> N <sub>2</sub> | 3.45        | 0.34 ± 0.09   | Great Barrier Reef, Australia   | Larkum <i>et al.</i> (1988)         |

|                |                                    |      |                |                                       |                                  |
|----------------|------------------------------------|------|----------------|---------------------------------------|----------------------------------|
|                | ARA + <sup>15</sup> N <sub>2</sub> | 3.45 | 0.81 ± 0.30    | Great Barrier Reef, Australia         | Larkum <i>et al.</i> (1988)      |
|                | ARA                                | 4.00 | 8.21 ± 2.70    | New Caledonia                         | Charpy <i>et al.</i> (2007)      |
| Microbial mats | ARA                                | 4.00 | 16.40 ± 5.40   | New Caledonia                         | Charpy <i>et al.</i> (2007)      |
|                | ARA + <sup>15</sup> N <sub>2</sub> | 1.60 | 8.00           | Tuamotu Archipelago, French Polynesia | Charpy-Roubaud and Larkum (2005) |
|                | ARA                                | 4.00 | 110.00         | Enewetak Atoll, Marshall Islands      | Mague and Holm-Hansen (1975)     |
| Seagrasses     | ARA + <sup>15</sup> N <sub>2</sub> | 3.16 | 19.00 - 40.00  | Moreton Bay, Australia                | O'Donohue <i>et al.</i> (1991)   |
|                | ARA + <sup>15</sup> N <sub>2</sub> | 4.40 | 145.00         | Great Barrier Reef, Australia         | Iizumi and Yamamuro (2000)       |
|                | ARA                                | 3.00 | 16.00 - 47.00  | Gulf of Carpentaria, Australia        | Moriarty and O'Donohue (1993)    |
|                | ARA                                | 3.00 | 13.00 - 19.00  | Gulf of Carpentaria, Australia        | Moriarty and O'Donohue (1993)    |
|                | ARA                                | 3.00 | 25.00          | Gulf of Carpentaria, Australia        | Moriarty and O'Donohue (1993)    |
|                | ARA                                | n.a. | 28.00          | Jamaica                               | Blackburn <i>et al.</i> (1994)   |
|                | ARA                                | n.a. | 0.03           | Florida, USA                          | McRoy <i>et al.</i> (1973)       |
|                | ARA                                | 3.00 | 5.00 - 24.00   | Biscayne Bay, Florida, USA            | Capone and Taylor (1980)         |
|                | ARA                                | 3.00 | 5.10 - 9.00    | Bimini Harbour, Bahamas               | Capone <i>et al.</i> (1979)      |
|                | ARA                                | 3.00 | 27.00 - 140.00 | Barbados                              | Patriquin and Knowles (1972)     |

## References

- Blackburn T, Nedwell D, Wiebe W (1994) Active mineral cycling in a Jamaican seagrass sediment. *Marine Ecology Progress Series*, **110**, 233-239.
- Capone DG, Dunham SE, Horrigan SG, Duguay LE (1992) Microbial nitrogen transformations in unconsolidated coral-reef sediments. *Marine Ecology Progress Series*, **80**, 75-88.
- Capone DG, Penhale PA, Oremland RS, Taylor BF (1979) Relationship Between Productivity and N<sub>2</sub> (C<sub>2</sub>H<sub>2</sub>) Fixation in a *Thalassia testudinum* Community. *Limnology and Oceanography*, **24**, 117-125.
- Capone DG, Taylor BF (1980) N<sub>2</sub> fixation in the rhizosphere of *Thalassia testudinum*. *Canadian Journal of Microbiology*, **26**, 998-1005.
- Charpy-Roubaud C, Charpy L, Larkum AWD (2001) Atmospheric dinitrogen fixation by benthic communities of Tikehau Lagoon (Tuamotu Archipelago, French Polynesia) and its contribution to benthic primary production. *Marine Biology*, **139**, 991-997.
- Charpy-Roubaud C, Larkum AWD (2005) Dinitrogen fixation by exposed communities on the rim of Tikehau atoll (Tuamotu Archipelago, French Polynesia). *Coral Reefs*, **24**, 622-628.
- Charpy L, Alliod R, Rodier M, Golubic S (2007) Benthic nitrogen fixation in the SW New Caledonia lagoon. *Aquatic Microbial Ecology*, **47**, 73-81.

- Corredor JE, Capone DG (1985) Studies on nitrogen diagenesis in coral reef sands. In: *The Fifth International Coral Reef Congress*. (eds Gabrie C, Toffart JL, Salvat B) pp Page, Tahiti, French Polynesia.
- Davey M, Holmes G, Johnstone R (2008) High rates of nitrogen fixation (acetylene reduction) on coral skeletons following bleaching mortality. *Coral Reefs*, **27**, 227-236.
- Iizumi H, Yamamuro M (2000) Nitrogen fixation activity by periphytic blue-green algae in a seagrass bed on the Great Barrier Reef. *Japan Agricultural Research Quarterly*, **34**, 69-73.
- Larkum AWD (1988) High rates of nitrogen fixation on coral skeletons after predation by the crown of thorns starfish *Acanthaster planci*. *Marine Biology*, **97**, 503-506.
- Larkum AWD, Kennedy IR, Muller WJ (1988) Nitrogen fixation on a coral reef. *Marine Biology*, **98**, 143-155.
- Lesser MP, Falcon LI, Rodriguez-Roman A, Enriquez S, Hoegh-Guldberg O, Iglesias-Prieto R (2007) Nitrogen fixation by symbiotic cyanobacteria provides a source of nitrogen for the scleractinian coral *Montastraea cavernosa*. *Marine Ecology Progress Series*, **346**, 143-152.
- Mague TH, Holm-Hansen O (1975) Nitrogen fixation on a coral reef. *Phycologia*, **14**, 87-92.
- Mcroy CP, Goering JJ, Chaney B (1973) Nitrogen fixation associated with seagrasses. *Limnology and Oceanography*, **18**, 998-1002.
- Moriarty D, O'donohue M (1993) Nitrogen fixation in seagrass communities during summer in the Gulf of Carpentaria, Australia. *Marine and Freshwater Research*, **44**, 117-127.
- O'donohue MJ, Moriarty DJW, Rae ICM (1991) Nitrogen fixation in sediments and the rhizosphere of the seagrass *Zostera capricorni*. *Microbial Ecology*, **22**, 53-64.
- O'neil JM, Capone D (1989) Nitrogenase activity in tropical carbonate marine sediments. *Marine Ecology Progress Series*, **56**, 145-156.
- Patriquin D, Knowles R (1972) Nitrogen fixation in the rhizosphere of marine angiosperms. *Marine Biology*, **16**, 49-58.
- Patriquin DG, Knowles R (1975) Effects of oxygen, mannitol and ammonium concentrations on nitrogenase [C<sub>2</sub>H<sub>2</sub>] activity in a marine skeletal carbonate sand. *Marine Biology*, **32**, 49-62.
- Shashar N, Cohen Y, Loya Y, Sar N (1994a) Nitrogen-fixation (acetylene reduction) in stony corals - evidence for coral-bacteria interactions. *Marine Ecology Progress Series*, **111**, 259-264.
- Shashar N, Feldstein T, Cohen Y, Loya Y (1994b) Nitrogen-fixation (acetylene reduction) on a coral reef. *Coral Reefs*, **13**, 171-174.
- Werner U, Blazejak A, Bird P *et al.* (2008) Microbial photosynthesis in coral reef sediments (Heron Reef, Australia). *Estuarine Coastal and Shelf Science*, **76**, 876-888.
- Wilkinson CR, Williams DM, Sammarco PW, Hogg RW, Trott LA (1984) Rates of nitrogen-fixation on coral reefs across the continental-shelf of the central Great Barrier Reef. *Marine Biology*, **80**, 255-262.
- Williams SL, Carpenter RC (1997) Grazing effects on nitrogen fixation in coral reef algal turfs. *Marine Biology*, **130**, 223-231.
- Williams SL, Carpenter RC (1998) Effects of unidirectional and oscillatory water flow on nitrogen fixation (acetylene reduction) in coral reef algal turfs, Kaneohe Bay, Hawaii. *Journal of Experimental Marine Biology and Ecology*, **226**, 293-316.
